# Supplementary material for: Surface modification of garnet with amorphous SnO2via atomic layer deposition
Source: Royal Society of Chemistry journal article supplement (doi:10.1039/c9ta13347j), 2020-01-01
Supplement: c9ta13347j1.pdf [file c9ta13347j1.pdf]

Electronic Supplementary Information (ESI)

## **Surface Modification of Garnet Solid Electrolytes with Amorphous SnO<sub>2</sub> via Atomic Layer Deposition**

Bin Tang<sup>a</sup>, Longxue Gao<sup>a</sup>, Junqing Liu<sup>a,\*</sup>, Shou-Hang Bo<sup>b</sup>, Zhaojun Xie<sup>a</sup>, Jinping Wei<sup>a</sup>, Zhen Zhou<sup>a,c\*</sup>

<sup>a</sup> School of Materials Science and Engineering, Institute of New Energy Material Chemistry, Key Laboratory of Advanced Energy Materials Chemistry (Ministry of Education), Renewable Energy Conversion and Storage Center (ReCast), Nankai University, Tianjin 300350, P. R. China.

<sup>b</sup> University of Michigan-Shanghai Jiao Tong University Joint Institute, Shanghai Jiao Tong University, 800 Dong Chuan Rd., Minhang District, Shanghai 200240, P. R. China.

<sup>c</sup> Engineering Research Center of Advanced Functional Material Manufacturing of Ministry of Education, School of Chemical Engineering, Zhengzhou University, Zhengzhou 450001, P. R. China.

\*Corresponding Author, Email: [junqingliu@nankai.edu.cn](mailto:junqingliu@nankai.edu.cn) (JL); [zhouzhen@nankai.edu.cn](mailto:zhouzhen@nankai.edu.cn)

(ZZ)

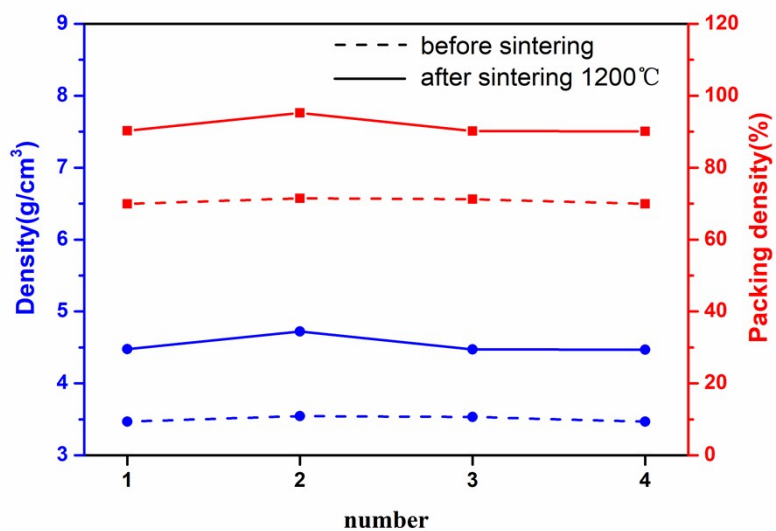

**Fig. S1** Density and packing density of LLCZN before and after sintering.

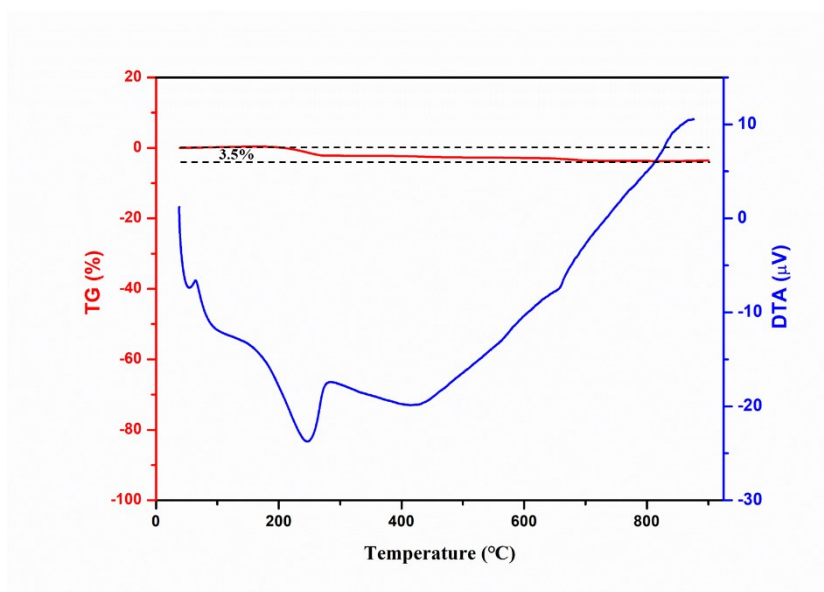

**Fig. S2** TGA curve of the LLCZN powders with no obvious weight loss.

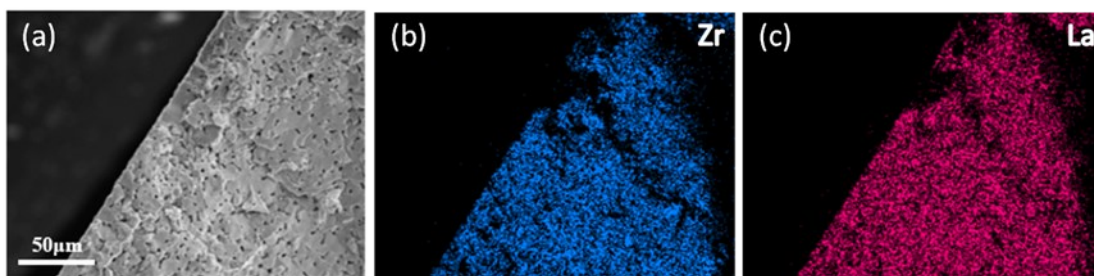

**Fig. S3** (a) SEM image of the cross section of LLCZN pellets and (b,c) EDS mapping of La and Zr which are uniformly distributed.

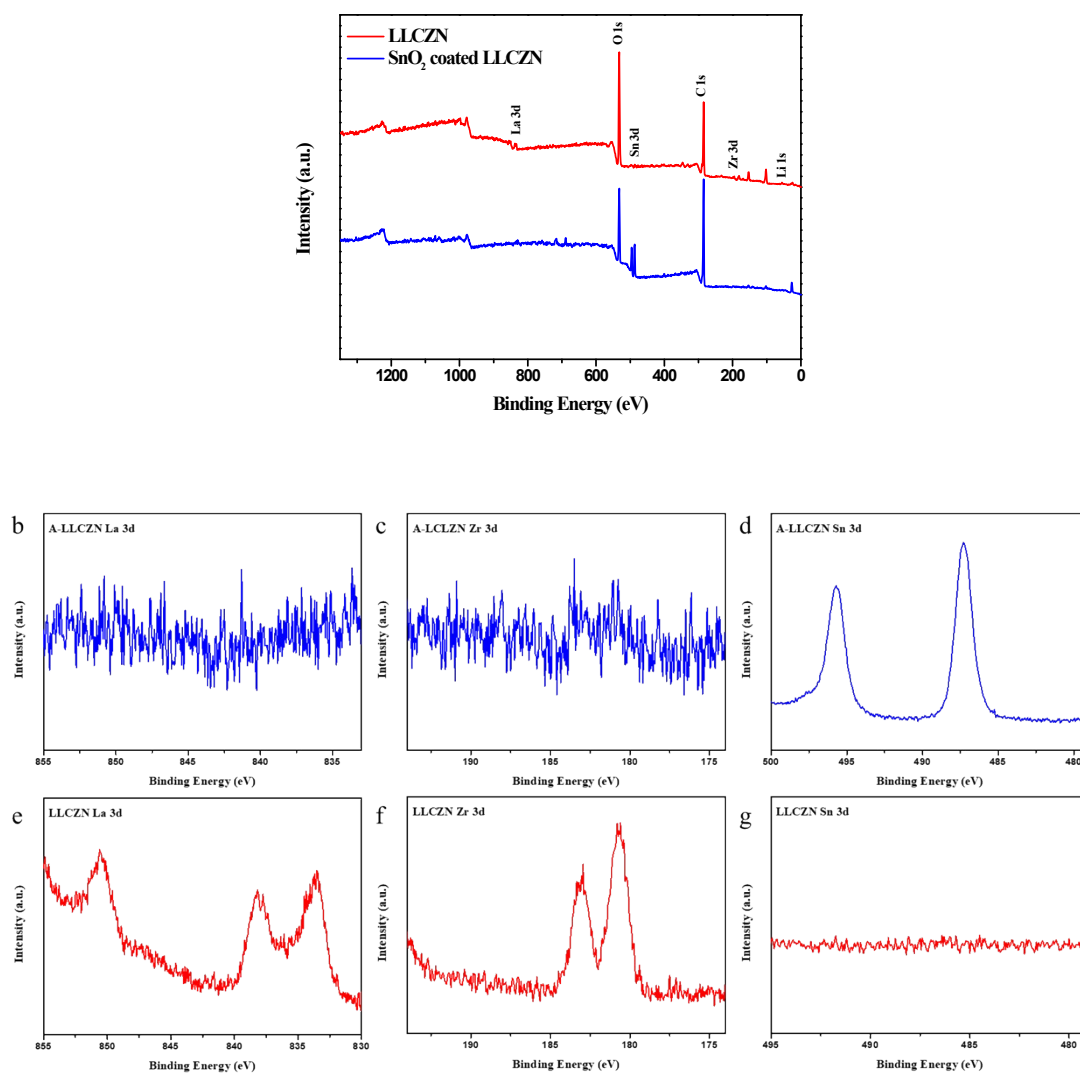

**Fig. S4** XPS of LLCZN and SnO<sub>2</sub> coated LLCZN. (a) Full spectra of Li, C, O, Sn, La, and Zr; (b,c,d) spectral lined of La, Zr, and Sn of pristine LLCZN; (e,f,g) spectral lines of La, Zr, and Sn of SnO<sub>2</sub> coated LLCZN.

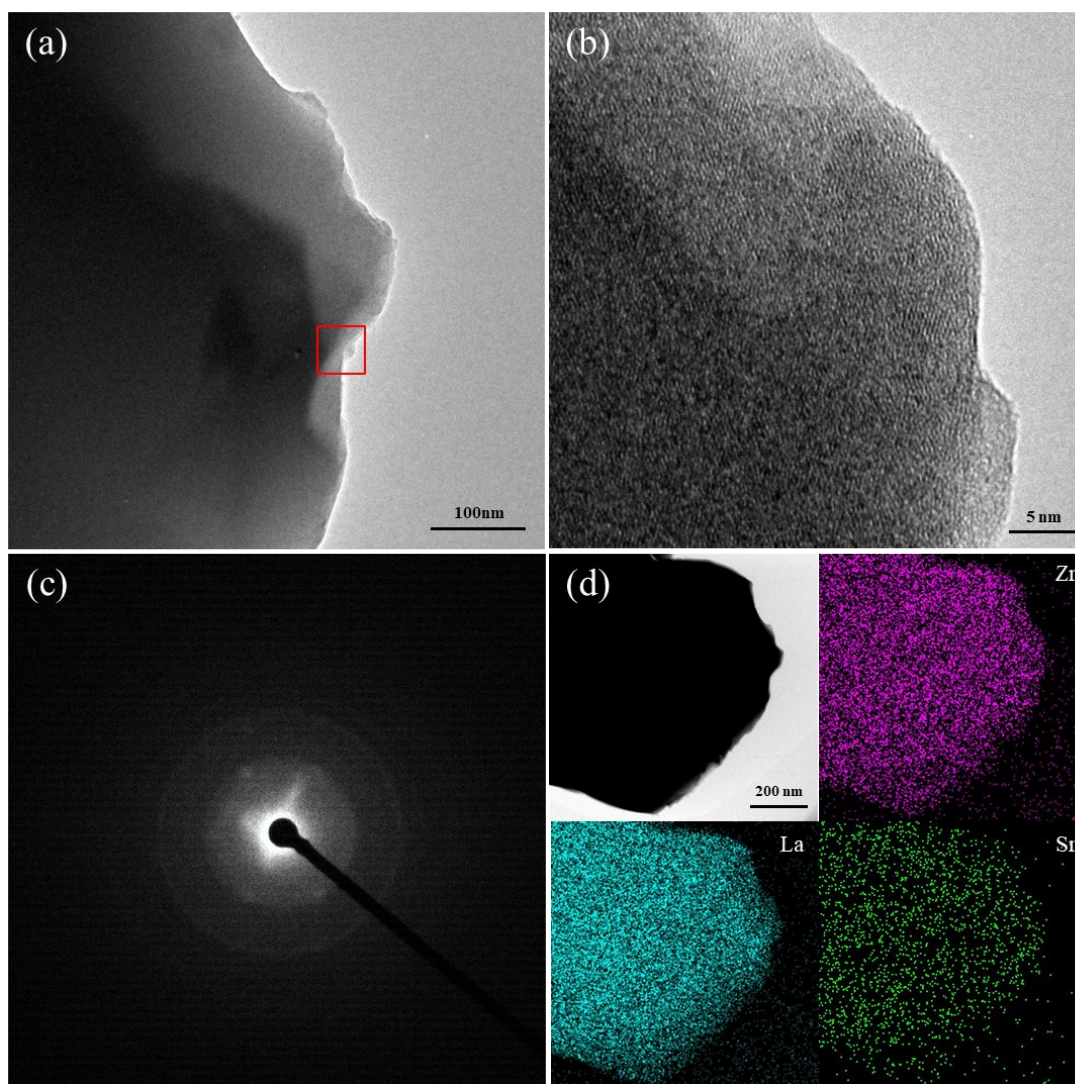

**Fig. S5** (a) Dark field TEM image of as-scratched SnO<sub>2</sub> powders, (b) HRTEM image of the red box area, and (c) SAED pattern. (d) Overall EDS mapping images of Zr, La and Sn.

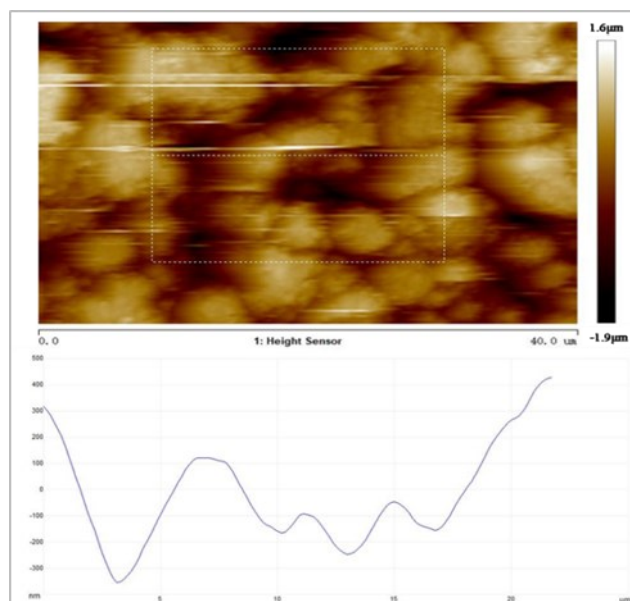

**Fig. S6** AFM image of the pristine LLCZN pellet, which shows a rough surface with a fluctuation of over 100 nm.

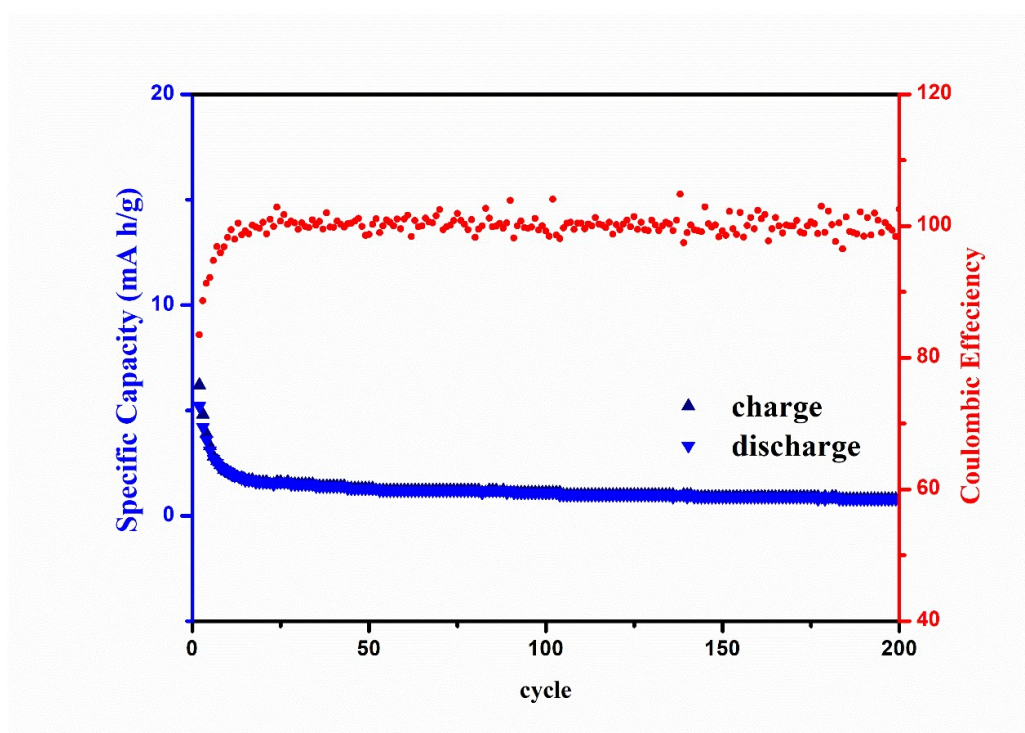

**Fig. S7** Specific capacity and coulombic efficiency of Li|liquid electrolyte|LLCZN cells with the cut-off voltage from 0.5 V to 4.2 V.

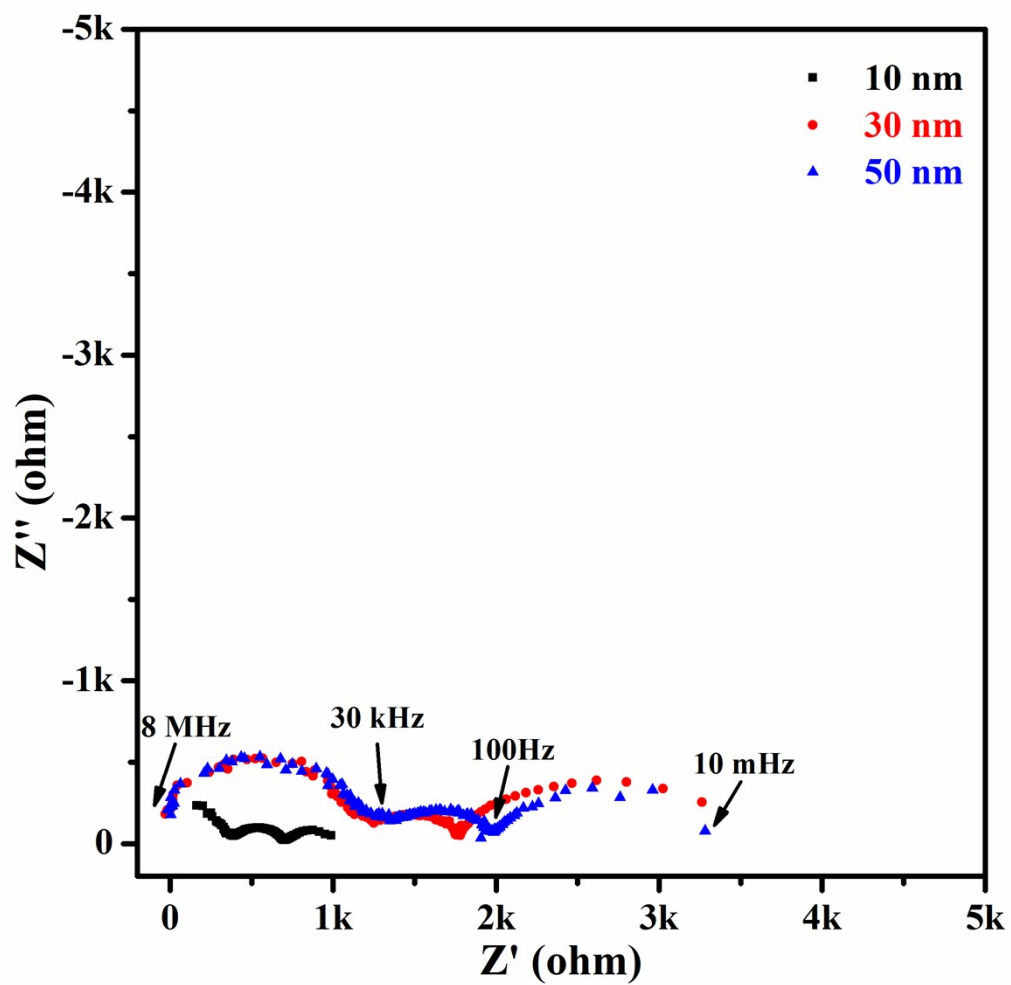

Fig. S8 EIS images of lithium symmetric cell of different thickness of SnO<sub>2</sub>.

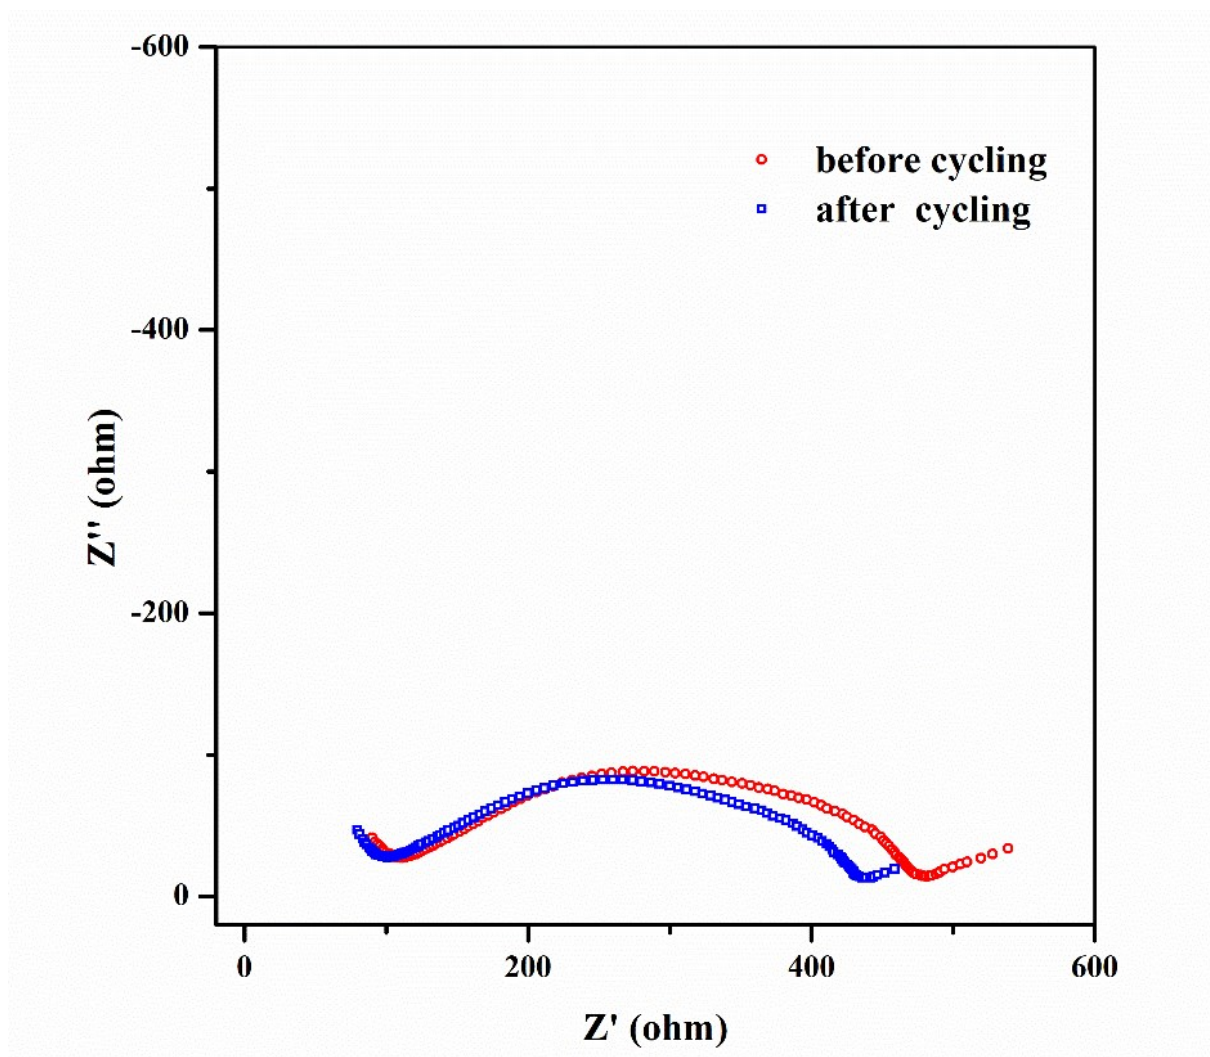

**Fig. S9** EIS of the symmetric cell before and after cycling.

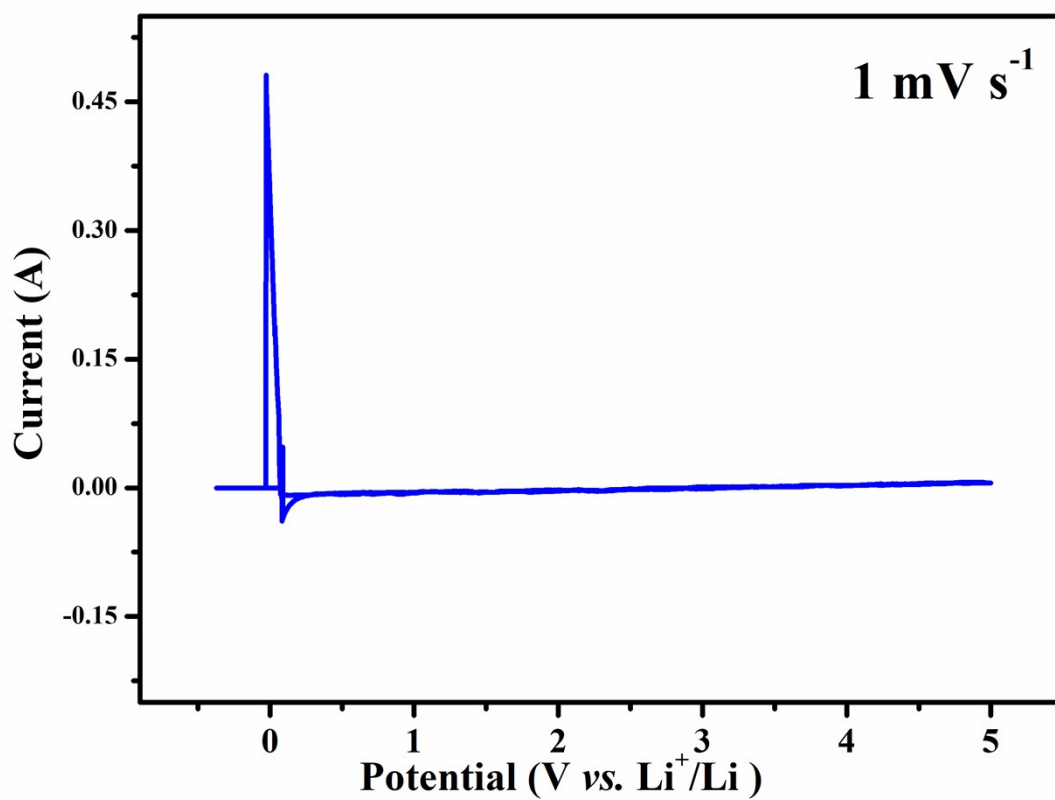

**Fig. S10** CV curve of Li/LLCZN ALD SnO<sub>2</sub>/Li cells at the voltage range of -0.5-5V with the scan rate of 1 mV s<sup>-1</sup>.



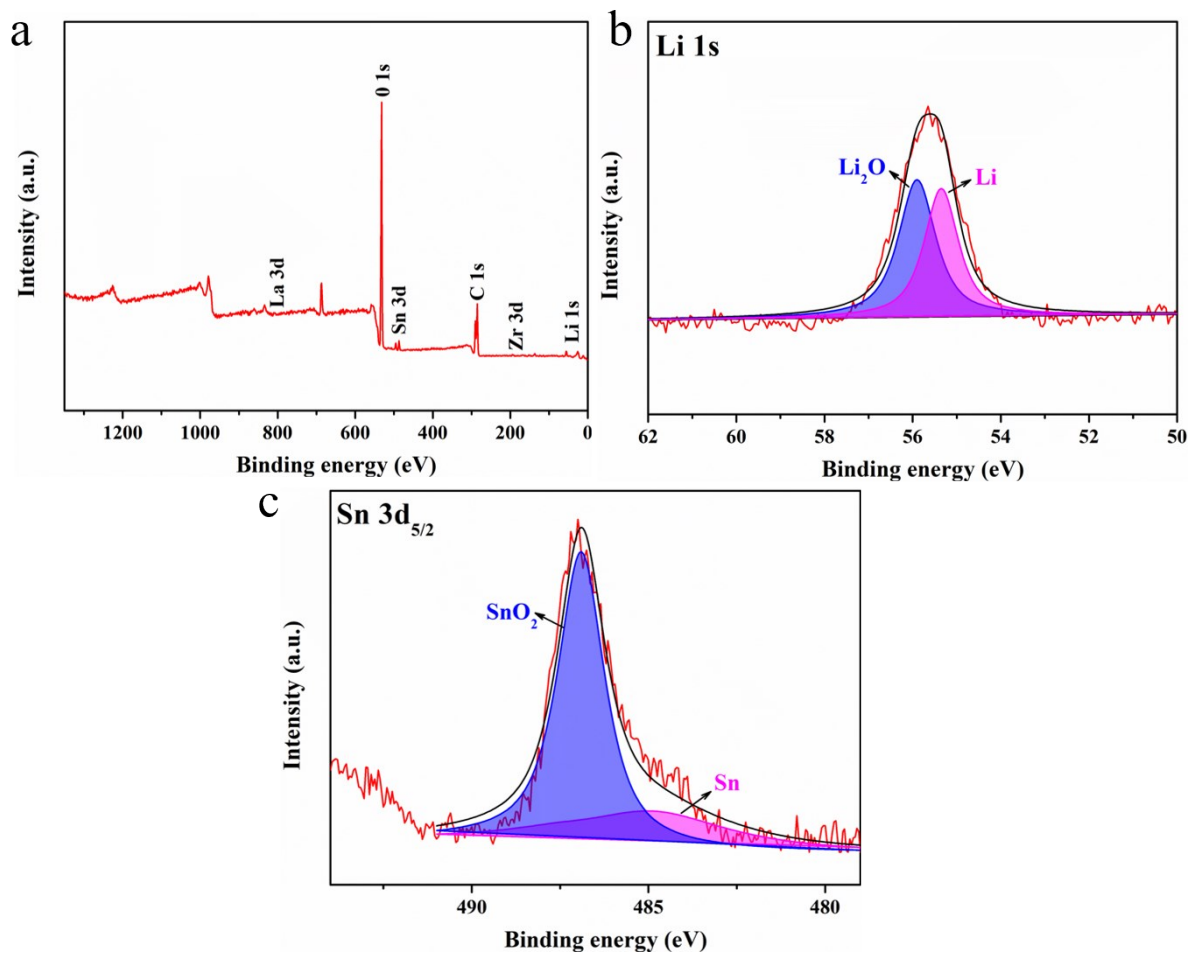

**Fig. S11** XPS of after-cycled SnO<sub>2</sub> coated LLCZN. (a) Full spectra of Li, C, O, Sn, La, and Zr; (b) spectral lined of Li 1s; (c) spectral lines of Sn 3d<sub>5/2</sub>.
